# Supplementary material for: Reevaluating Scorpion Ecomorphs using a Naïve Approach
Source: Research Square preprint supplement (doi:10.21203/rs.3.rs-1017831/v1), 2021-11-01
Supplement: Supplementary file 1 [file 2c8062d8ddad71961ece33be.xlsx]

## Sheet: Sheet1
Abbreviation	Description	Body part
L Prosoma	Length of the prosoma along the midline	Prosoma
L Median eyes to front edge	Distance of the median eyes to the front edge of the prosoma	Prosoma
W Prosoma, midlle	Width of the prosoma half way between anterior and posterior edge	Prosoma
W Prosoma	Width of the prosoma at its maximum width	Prosoma
W Mesosoma 1th terg.	Width of the first tergite (dorsal plate) of the mesosoma	Mesosoma
W Mesosoma 4th terg.	Width of the fourth tergite (dorsal plate) of the mesosoma	Mesosoma
L Mesosoma 4th terg.	Length of the fourth tergite (dorsal plate) of the mesosoma	Mesosoma
W Mesosoma 7th terg.	Width of the seventh tergite (dorsal plate) of the mesosoma	Mesosoma
L Metasoma 1st	Length (rostral-caudal) of metasoma segment 1	Metasoma
L 2nd	Length (rostral-caudal) of metasoma segment 2	Metasoma
L 3rd	Length (rostral-caudal) of metasoma segment 3	Metasoma
L 4th	Length (rostral-caudal) of metasoma segment 4	Metasoma
L 5th	Length (rostral-caudal) of metasoma segment 5	Metasoma
W 1st	Width of metasoma segment 1	Metasoma
W 2nd	Width of metasoma segment 2	Metasoma
W 3rd	Width of metasoma segment 3	Metasoma
W 4th	Width of metasoma segment 4	Metasoma
W 5th	Width of metasoma segment 5	Metasoma
H 1st	Height (dorsoventral) of metasoma segment 1	Metasoma
H 2st	Height (dorsoventral) of metasoma segment 2	Metasoma
H 3rd	Height (dorsoventral) of metasoma segment 3	Metasoma
H 4th	Height (dorsoventral) of metasoma segment 4	Metasoma
H 5th	Height (dorsoventral) of metasoma segment 5	Metasoma
L telson	Length of the telson	Telson
H vesicle	Height of the telson vesicle (venom gland)	Telson
W vesicle	Width of the venom vesicle (venom gland)	Telson
	Note: All podomere measurements are made on the left side of the body wherever possible
L left leg1 trochanter	Length of the second segment (trochanter) of leg 1	Podomeres
L left leg1 femur	Length of the third segment (femur) of leg 1	Podomeres
L left leg1 patella	Length of the fourth segment (patella) of leg 1	Podomeres
L left leg1 tibia	Length of the fifth segment (tibia) of leg 1	Podomeres
L left leg1 metatarsus	Length of thesixth segment (metatarsus) of leg 1	Podomeres
L left leg1 tarsus	Length of the seventh segment (metatarsus) of leg 1	Podomeres
L left leg2 trochanter	Length of the second segment (trochanter) of leg 2	Podomeres
L left leg2 femur	Length of the third segment (femur) of leg 2	Podomeres
L left leg2 patella	Length of the fourth segment (patella) of leg 2	Podomeres
L left leg2 tibia	Length of the fifth segment (tibia) of leg 2	Podomeres
L left leg2 metatarsus	Length of the sixth segment (metatarsus) of leg 2	Podomeres
L left leg2 tarsus	Length of the seventh segment (metatarsus) of leg 2	Podomeres
L left leg3 trochanter	Length of the second segment (trochanter) of leg 3	Podomeres
L left leg3 femur	Length of the third segment (femur) of leg 3	Podomeres
L left leg3 patella	Length of the fourth segment (patella) of leg 3	Podomeres
L left leg3 tibia	Length of the fifth segment (tibia) of leg 3	Podomeres
L left leg3 metatarsus	Length of the sixth segment (metatarsus) of leg 3	Podomeres
L left leg3 tarsus	Length of the seventh segment (metatarsus) of leg 3	Podomeres
L left leg4 trochanter	Length of the second segment (trochanter) of leg 4	Podomeres
L left leg4 femur	Length of the third segment (femur) of leg 4	Podomeres
L left leg4 patella	Length of the fourth segment (patella) of leg 4	Podomeres
L left leg4 tibia	Length of the fifth segment (tibia) of leg 4	Podomeres
L left leg4 metatarsus	Length of the sixth segment (metatarsus) of leg 4	Podomeres
L left leg4 tarsus	Length of the seventh segment (metatarsus) of leg 4	Podomeres
	Left pedipalp
L left Pedipalp femur	Length of the third segment (femur) of the pedipalp	Pedipalps
W left femur	Width of the third segment (femur) of the pedipalp	Pedipalps
H left femur	Height (dorsoventral) of the third segment (femur) of the pedipalp	Pedipalps
L left patella	Length of the fourth segment (patella) of the pedipalp	Pedipalps
W left patella	Width of the fourth segment (patella) of the pedipalp	Pedipalps
H left patella	Height (dorsoventral) of the fourth segment (patella) of the pedipalp	Pedipalps
L left chela	Length of the fifth segment (tibia or chela) of the pedipalp	Pedipalps
W left chela	Width of the fifth segment (tibia or chela) of the pedipalp	Pedipalps
H left chela	Height (dorsoventral) of the fifth segment (tibia or chela) of the pedipalp	Pedipalps
L left mov finger	Length of the movable finger of the chela	Pedipalps
	Right pedipalp
L right Pedipalp femur	Length of the third segment (femur) of the pedipalp	Pedipalps
W right femur	Width of the third segment (femur) of the pedipalp	Pedipalps
H right femur	Height (dorsoventral) of the third segment (femur) of the pedipalp	Pedipalps
L right patella	Length of the fourth segment (patella) of the pedipalp	Pedipalps
W right patella	Width of the fourth segment (patella) of the pedipalp	Pedipalps
H right patella	Height (dorsoventral) of the fourth segment (patella) of the pedipalp	Pedipalps
L right chela	Length of the fifth segment (tibia or chela) of the pedipalp	Pedipalps
W right chela	Width of the fifth segment (tibia or chela) of the pedipalp	Pedipalps
H right chela	Height (dorsoventral) of the fifth segment (tibia or chela) of the pedipalp	Pedipalps
L right mov finger	Length of the movable finger of the chela	Pedipalps
