# Supplementary material for: Reevaluating Scorpion Ecomorphs using a Naïve Approach
Source: Research Square preprint supplement (doi:10.21203/rs.3.rs-1017831/v1), 2021-11-01
Supplement: Supplementary file 2 [file 7ba88dfbc2e05256aa013abe.xlsx]

## Sheet: Folha1
Species	Microhabitat Cluster	L.Prosoma	L.Median.eyes.to.front.edge	W.Prosoma.midlle	W.Prosoma	W.Mesosoma.1th.terg.	W.Mesosoma.4th.terg.	L.Mesosoma.4th.terg.	W.Mesosoma.7th.terg.	Metasoma.L	Metasoma.avWidth	Metasoma.avHeight	L.telson	H.vesicle	W.vesicle	Proximal.leg.1	Distal.leg.1	L.left.leg1.tarsus	Proximal.leg.2	Distal.leg.2	L.left.leg2.tarsus	Proximal.leg3	Distal.leg3	L.left.leg3.tarsus	Proximal.leg4	Distal.leg4	L.left.leg4.tarsus	L.Pedipalp.femur	W.femur	H.femur	L.patella	W.patella	H.patella	L.chela	W.chela	H.chela	L.mov.finger	compact.soil	loose.sand	rock.surface	leaf.litter	under.rocks	under.vegetation	dug.burrow	passive.shelter	climb.bushes	climb.trees	rock.crevices	hanging.upside.down
Chaerilus_variegatus	Phytophilous	4.81	1.36	4.61	5.53	5.45	5.65	1.24	3.95	13.26	2.44	2.12	6.33	2.06	2.26	4.29	6.08	1.45	4.08	6.22	1.05	5.06	7.01	1.23	6.58	7.52	1.38	3.63	1.92	1.89	4.16	2.29	2.42	9.55	3.23	6.04	5.15	0	0	0	1	1	1	0	1	0	0	0	0
Apistobuthus_pterygocercus	Psammophilous	9.98	4.58	9.27	10.86	10.89	12.48	2.58	10.76	45.99	7.23	5.27	8.55	3.33	3.82	8.32	12.37	1.73	11.48	15.77	1.94	16.5	19.34	2.25	17.65	19.07	2.59	9.92	2.4	2.1	11.3	2.99	2.37	21.12	3.24	3.73	16.91	0	1	0	0	0	0	0	0	0	0	0	0
Buthiscus_bicalcaratus	Psammophilous	7.13	4.51	5.16	7.49	8.06	8.89	2.55	6.93	32.33	3.55	3.09	6.55	2.12	2.07	4.91	7.93	1.2	6.91	9.41	1.23	10.27	11.78	1.44	12.1	11.24	1.44	5.41	2.07	1.89	6.5	2.88	2.3	10.28	3.12	3.4	5.88	0	1	0	0	0	0	1	1	0	0	0	0
Buthacus_sp	Psammophilous	4.76	2.42	4.71	5.87	6.39	7.32	7.67	5.34	24.95	2.65	2.44	5.77	1.59	1.77	3.56	5.36	0.8	5.02	6.66	0.95	7.07	8.44	1.1	8.71	8.83	1.21	3.85	1.25	1.23	5.23	1.71	1.42	7.08	1.54	1.47	4.25	0	1	0	0	0	0	1	1	0	0	0	0
Compsobuthus_werneri	Pelophilous	3.94	2.03	4.7	4.98	4.93	5.34	1.59	4.18	19.2	2.55	2.28	4.54	1.9	1.96	2.96	4.48	0.78	4.38	4.99	0.69	6.14	7.03	0.78	7.14	8.14	1.14	3.51	1.17	1.18	4.1	1.88	1.89	7.3	1.63	1.62	4.81	1	1	0	0	1	0	0	1	0	0	0	0
Hottentotta_gentili	Phytophilous	11.45	4.68	11.1	12.46	13.21	14.47	2.92	11.78	46.22	6.05	5.39	12.03	5.09	5.38	8.74	14.39	2.09	11.42	16.25	1.92	14.23	17.59	2.53	16.54	18.95	2.38	10.6	3.2	2.34	12.17	4.56	3.27	21.68	5.01	4.85	14.88	1	0	1	1	1	1	0	1	1	1	0	0
Leiurus_quinquestriatus	Pelophilous	9.49	4.96	7.86	9.87	10.24	12.64	3.29	11.11	45.2	4.52	3.97	10.77	3.33	3.59	7.75	11.45	2.09	11.05	14.48	2.41	14.18	17.15	2.69	15.71	18.86	3.22	9.54	2.41	1.7	9.58	3.01	2.09	18.44	2.83	2.69	13.22	0	0	0	0	1	0	0	0	0	0	0	0
Odontobuthus_doriae	Pelophilous	9.18	4.14	9.05	9.72	10.3	12.12	3.13	8.79	36.47	4.76	4.24	9.2	3.6	3.9	7.19	10.4	1.88	9.45	12.02	1.97	12.99	14.22	2.01	14.86	15.85	1.81	7.72	2.4	2.09	8.55	3.06	2.69	16.47	3.18	3.72	11.62	1	0	0	0	0	0	1	0	0	0	0	0
Mesobuthus_gibbosus	Pelophilous	6.24	2.89	6.33	6.84	6.91	8	2.38	6.11	33.19	3.63	3.3	7.53	2.47	2.23	5.07	7.53	1.02	6.51	10.07	1.23	10.88	12.2	1.13	13.06	13.25	1.3	5.17	1.93	1.85	6.54	2.56	1.98	9.84	2.2	2.58	5.8	1	0	0	0	1	0	1	1	0	0	0	1
Mesobuthus_martensii	Pelophilous	5.85	2.49	5.2	6.32	6.68	7.89	2.26	5.82	24.75	3.41	3.09	6.56	2.24	2.35	4.34	7.17	1.17	5.46	8.19	0.8	8.43	9.42	1.41	9.38	10.14	1.64	4.85	1.17	1.82	5.89	2.23	1.97	10.51	2.28	2.67	6.82	1	0	1	0	1	0	1	1	0	0	1	0
Androctonus_crassicauda	Phytophilous	10.05	4.03	9.68	11.15	11.53	13.21	5.09	9.29	39.83	8.08	6.44	9.82	2.99	3.92	7.36	11.41	1.63	10.47	13.59	1.71	14.27	16.35	2.18	16.18	17.82	2.14	7.19	2.36	2.22	9.03	3.33	2.85	15.28	3.16	3.6	10.75	1	1	0	0	1	1	0	1	0	0	0	0
Androctonus_australis	Pelophilous	10.08	4.51	8.69	10.43	10.56	11.65	3.03	9.9	40.5	7.84	6.8	10.63	3.28	4.72	7.45	13.32	2	10.93	15.51	2.06	14.15	16.94	2.77	16.89	19.13	2.62	8.58	3.15	2.42	10.09	4.16	3.6	18.86	5.32	6.14	12.61	1	0	1	0	0	0	0	1	0	0	0	0
Buthus_ibericus	Psammophilous	6.95	3.49	6.51	7.99	7.74	9.01	2.57	7.86	32.25	4.26	3.71	7.14	3.12	3.51	4.69	7.71	1.08	6.77	9.89	1.67	9.78	12.07	1.49	11.49	13.53	1.92	5.64	1.75	1.55	6.86	2.94	2.67	12.41	4.22	3.53	7.6	1	1	1	0	0	0	0	1	1	0	0	0
Buthus_bonito	Psammophilous	6.8	3.59	6.07	7.83	7.85	8.36	1.97	6.46	29.36	3.97	3.39	6.93	2.74	2.99	5.25	6.62	1.7	7.9	9.39	1.45	9.71	11.43	2.36	10.75	11.67	2.46	5.59	1.72	1.81	5.27	2.22	2.78	11.94	2.52	3.7	7.65	0	1	0	0	1	0	1	1	0	0	0	0
Orthochirus_innesi	Phytophilous	3.55	1.3	2.27	4.28	4.74	5.5	1.14	4.44	14.51	3.18	2.3	3.87	1.08	1.11	2.84	3.94	0.69	3.42	6.18	1.27	4.61	5.9	1.1	5.91	6.26	1.16	2.13	0.82	1.05	2.74	0.82	0.95	4.56	0.77	0.83	3.03	0	0	0	0	1	1	0	1	1	0	0	0
Microbuthus_sp	Phytophilous	2.61	1.15	2.25	3.52	3.54	4.48	1.08	2.98	9.8	1.68	1.34	2.13	0.84	0.7	1.51	2.57	0.41	2.43	3.18	0.36	3.49	3.73	0.45	3.84	4.1	0.51	2.35	0.73	0.5	2.5	0.69	0.6	4.35	0.67	0.7	2.93	1	1	1	0	1	1	0	1	0	0	0	0
Lychas_mucronatus	Phytophilous	5.21	1.81	5.08	4.73	5.5	5.5	2.1	4.7	22.21	2.84	2.45	6.15	1.96	1.99	4.49	6.53	0.74	5.45	7.52	1.02	6.3	8.81	1.13	7.74	9.73	1.27	4.69	1.38	1.14	5.41	1.84	1.34	8.77	1.78	1.92	5.86	0	0	0	1	1	1	0	1	0	1	0	0
Parabuthus_liosoma	Pelophilous	6.78	3.01	5.56	6.98	6.89	7.82	2.1	5.98	28.25	4.36	3.69	6.76	2.8	3.21	4.42	7.93	1	6.52	8.3	1.76	8.03	10.23	1.24	10.04	12.11	1.89	4.7	1.72	1.56	5.93	2.44	2.25	10.03	2.24	2.36	6.45	1	0	0	0	1	0	0	1	0	0	0	0
Uroplectes_flavoviridis	Phytophilous	4.49	1.74	4.7	5.15	5.64	6.24	2.55	4.77	22.74	2.77	2.22	4.96	1.69	1.89	4	6.29	0.95	5.13	6.65	0.84	6.4	8.32	1.24	7.31	8.85	1.47	4.22	1.24	1.14	5.07	1.75	1.44	8.6	1.57	1.59	5.89	0	0	0	0	1	1	0	1	0	0	0	0
Rhopalurus_crassicauda	Pelophilous	4.72	1.84	4.26	5.49	5.49	6.63	1.91	5.67	19.19	3.22	2.45	4.32	1.66	1.75	4.32	5.38	0.95	4.72	6.07	1	5.79	7.54	1.03	7.05	8.18	1.31	4.15	1.51	1.22	5.38	2.15	1.59	9.02	2.22	1.99	5.81	1	0	0	0	1	0	0	0	0	0	0	0
Tityus_bahiensis	Phytophilous	6.57	2.81	6.07	6.96	7.15	7.84	1.84	4.5	33.49	3.52	3.25	6.84	2.58	2.43	6.29	9.58	1.07	7.52	11.32	1.06	8.77	11.4	1.46	10.52	14.11	1.76	8.47	1.75	1.51	8.91	2.31	1.69	16.14	2.6	2.58	10.2	0	0	0	1	1	0	0	0	0	0	0	0
Tityus_trinitatis	Phytophilous	6.85	2.29	6.74	5.97	5.91	6.71	3.21	5.42	50.12	2.96	2.99	9.24	3.17	2.87	5.9	9.54	1.13	7.3	11.11	1.48	9.51	13.2	1.3	11.33	13.97	1.56	7.76	1.87	1.42	8.38	2.33	1.75	14.47	2.48	2.53	8.9	0	0	0	1	0	0	0	0	1	1	0	0
Centruroides_insulanus	Phytophilous	6.74	2.42	6.68	6.97	6.71	8.49	2.73	6.67	31.78	3.5	3.07	7.18	2.44	2.7	5.21	8.5	1.13	6.59	9.83	1.37	8.6	10.95	1.33	9.5	11.82	1.77	6.01	1.78	1.43	6.79	2.66	1.71	12.34	2.67	2.36	8.13	0	0	0	0	1	1	0	1	0	0	0	0
Centruroides_vittatus	Phytophilous	9.88	3.5	10.03	9.42	10.16	11.16	4.66	9.42	54.97	4.73	4.32	10.06	3.32	3.49	8.64	13.31	1.68	11.28	15.96	1.83	13.65	18.97	2.22	15.81	20.09	2.22	9.66	2.83	1.82	10.8	3.53	2.49	17.22	3.66	3.56	11.17	1	0	0	0	1	1	0	1	1	0	0	0
Iurus_dufoureius	Lithophilous	9.38	2.89	9.27	10.15	10.33	10.8	2.9	7.27	24.53	3.24	2.84	10.81	2.65	3.04	7.55	11.73	1.85	9.27	13.47	1.83	10.82	15.3	2.02	12.96	16.28	2.58	8.97	3.35	2.07	8.55	3.71	3.22	18.38	5.01	5.3	11.41	0	0	1	0	1	0	0	0	0	0	0	0
Bothriurus_coriaceus	Phytophilous	5.05	2.72	3.92	5.3	5.77	6.49	1.5	5.64	18.3	3.55	2.86	6.38	2.16	2.7	3.03	4.48	1.1	4.49	5.18	1.33	6.18	7.16	1.47	7.68	8.17	1.98	3.54	1.75	1.7	3.89	1.74	1.56	7.13	2.41	2.96	3.69	1	1	1	1	1	1	0	0	0	0	0	0
Brachistosternus_negrei	Psammophilous	6.21	2.99	4.6	6.12	6.39	7.52	1.88	5.87	24.43	3.6	2.94	6.72	2.26	2.62	3.72	5.26	1.11	4.81	6.82	1.2	8.06	9.08	1.34	9.84	9.98	1.6	3.84	1.33	1.52	3.64	1.6	1.84	7.61	1.94	2.61	4.54	1	1	0	0	0	1	0	0	0	0	0	0
Centromachetes_pococki	Phytophilous	5.83	2.05	5.83	6.54	6.47	7.1	1.85	5.91	22.78	4.02	2.91	7.83	2.96	3.68	4.23	6.49	1.15	5.7	7.14	0.91	7.89	8.84	1.42	9.9	10.39	1.73	4.8	1.54	2.16	5.56	2.14	2.74	10.37	3.85	4.51	5.65	1	0	0	1	1	1	0	1	0	0	0	0
Anuroctonus_phaiodactylus	Pelophilous	9.88	4.73	7.39	9.41	8.86	10.24	3.33	8.63	44.3	3.54	3.3	10.05	3.68	3.68	8.08	12.1	1.66	8.88	13.73	1.42	13.51	15.22	2.53	14.45	17.06	1.82	8.25	2.12	3.13	8.31	3.02	3.89	17.79	4.81	6.68	11.36	1	0	0	0	0	0	1	0	0	0	0	0
Brotheas_gervaisii	Phytophilous	8.49	2.5	8.51	8.87	9.12	10.35	3.18	7.28	23.48	4.02	3.28	8.41	2.36	2.67	6.69	9.75	1.24	7.5	8.12	1.4	9.09	12.29	1.63	11.35	12.92	2.41	6	2.74	2.84	6.44	3.03	3.63	14.43	4.48	6.13	8.28	0	0	0	1	0	1	0	1	0	0	0	0
Brotheas_granulatus	Phytophilous	7.9	2.1	7.9	8.07	8.59	8.67	2.66	6.77	14.41	2.68	2.24	8.55	2.67	2.94	6.48	9.49	1.46	7.02	9.98	1.53	8.74	11.98	2.13	10.98	13.13	2.04	5.7	2.57	2.65	6.59	2.96	3.57	14.33	4.37	5.38	8.71	0	0	0	1	0	1	0	1	0	0	0	0
Broteochactas_sp	Phytophilous	4.39	1.22	4.39	4.49	4.61	4.76	1	3.8	24.7	3.82	3.13	5.15	1.81	2.28	2.88	4.72	0.75	3.57	5.1	0.86	4.4	5.98	0.99	6.04	6.42	1.1	2.82	1.19	1.57	3.55	1.53	1.94	6.84	2.54	3.72	3.95	1	0	0	1	1	1	0	1	0	0	0	0
Chactas_laevipes	Phytophilous	8.63	2.76	8.38	7.93	8.1	7.2	2.15	5.74	22.23	3.05	2.53	8.56	2.93	3.09	5.89	9.28	1.47	7.52	10.41	1.31	8.82	12.03	1.6	10.46	13.07	1.93	9.01	2.72	1.91	8.98	2.83	2.5	17.78	3.82	4.23	8.93	0	0	0	1	1	1	0	1	0	0	0	0
Scorpiops_leptochirus	Pelophilous	7.03	1.69	6.36	7.21	6.78	7.5	2.3	6.02	18.06	2.88	2.41	6.35	2.17	2.23	5.33	7.56	1.28	6.09	8.14	1.4	7.71	9.32	1.37	9.34	10.3	1.75	5.79	2.43	1.87	6.02	2.63	2.68	12.87	4.5	3.62	7.04	1	0	0	0	1	0	0	1	0	0	0	0
Scorpiops_sp	Phytophilous	7.31	1.93	6.51	7.27	7.19	7.72	2.04	5.66	20.15	2.92	2.5	6.83	2.57	2.66	5.84	8.27	1.29	6.56	8.58	1.31	7.89	9.83	1.56	9.28	10.98	1.77	6.48	2.48	2.06	6.83	2.67	2.7	13.96	4.27	3.78	7.33	0	0	0	0	1	0	0	0	1	1	0	1
Euscorpiops_vachoni	Lithophilous	8.09	3.17	8.37	9.06	9.06	8.68	2.14	6.16	17.61	2.49	2.23	6.54	1.93	2.11	6.57	10.57	1.4	8.45	11.63	1.7	8.68	11.87	1.67	10.27	11.98	2.02	8.35	3.26	1.89	7.51	3.35	2.81	17.58	4.96	4.28	9.18	0	0	1	0	1	0	0	0	0	0	1	1
Euscorpius_flavicaudis	Lithophilous	6.29	2.46	6.11	6.33	6.41	6.42	1.67	4.65	15.09	1.59	1.52	5.39	1.6	1.56	4.5	6.4	1.3	5.28	7.38	1.23	6.33	8.16	1.11	7.28	8.36	1.27	4.31	1.82	1.4	4.93	1.98	1.57	10.15	2.95	2.89	5.82	0	0	1	1	0	0	0	1	0	0	1	0
Belisarius_xambeui	Phytophilous	4.45	3.42234	4.38	4.66	4.66	4.9	2.44	4.86	13.93	1.95	1.42	5.14	1.88	2.59	3.25	5.37	0.59	4.25	5.66	1.17	6.14	7.57	1.07	6.37	7.6	1.47	3.61	1.53	1.38	4.35	1.56	1.85	9.18	2.49	3.72	5.57	1	0	0	1	1	1	0	1	0	0	0	0
Caraboctonus_keyserlingi	Pelophilous	7.25	3.21	5.61	7.23	7.81	8.9	2.04	6.36	22.9	4.34	3.55	8.02	3	4.26	4.51	6.31	0.92	5.42	8.06	0.99	7.89	10.12	1.59	9.78	10.98	1.7	4.64	1.94	3.97	4.14	2.34	2.37	10.25	3.32	3.38	5.66	1	0	1	0	1	0	0	0	0	0	0	0
Hadrurus_arizonensis	Psammophilous	12.53	7.46	10.08	13.49	13.03	14.82	5.22	10.75	47.21	5.9	4.99	12.89	5.17	5.45	8.17	12.38	1.92	12.54	14.53	3.17	15.57	19.95	2.91	18.81	20.06	3.14	9.78	3	2.98	10.77	4.05	4.2	18.68	4.14	6.24	12.29	1	1	0	0	0	0	1	0	0	0	0	0
Hormurus_neocaledonicus	Phytophilous	8.13	3.01	7.68	8.58	7.99	8.37	2.4	5.69	15.4	1.68	1.89	7.69289	1.64	1.59	5.35	7.49	1.18	7.15	8.43	1.28	7.69	9.61	1.67	8.56	9.79	1.57	6.47	3.07	1.85	6.94	3.58	2.85	15.14	5.82	3.42	7.94	1	0	0	1	1	1	0	1	0	0	1	0
Urodacus_sp	Pelophilous	6.63	3.42	6.29	6.84	6.78	8.04	2.66	6.6	21.05	2.97	2.59	6.18	1.99	2.31	4.46	6.9	1.67	5.93	6.86	1.31	7.43	8.34	1.69	8.15	9.04	1.66	4.68	1.96	2.38	5.3	2.34	3.08	11.74	4.28	5.46	6.44	1	0	1	0	1	0	1	0	0	0	1	0
Didymocentrus_lesueurii	Pelophilous	5.84	1.81	5.61	5.94	5.77	6.15	2.56	5.27	19.87	2.79	2.31	5.15	2.03	2.55	3.7	5.96	1.14	4.41	5.69	0.99	6.01	7	1.25	6.75	8.4	1.68	4.31	2.15	1.71	4.68	2.15	2.52	9.94	5.38	3.25	6.48	1	0	0	0	1	0	0	1	0	0	0	0
Nebo_sp	Pelophilous	11.66	3.1	10.68	11.62	11.4	11.7	3.9	9.47	47.49	4.4	3.85	10.46	3.82	4.51	9.51	13.08	2.02	11.82	14.61	2.13	13.73	16.59	2.2	16.63	17.7	2.77	11.45	4.41	2.53	11.51	4.43	3.79	23.77	7.85	5.65	14.63	1	0	1	0	1	0	1	0	0	0	1	0
Palaeocheloctonus_pauliani	Phytophilous	6.35	2.66	6.17	6.5	6.26	6.32	2.81	4.22	16.51	1.13	1.28	4.96	1.44	1.3	4.28	5.88	1.09	5.24	6.11	0.98	6.65	7.4	1.11	7.39	6.99	0.75	5.67	2.78	1.82	7.38	3.43	2.14	11.77	3.61	3.79	5.96	0	0	0	1	1	0	0	1	0	0	0	0
Cheloctonus_jonesii	Pelophilous	10.65	4.62	10.26	9.17	8.81	8.81	4.58	7.04	26.59	2.86	2.91	7.69289	1.94	2.38	6.15	8.71	1.98	7.98	8.34	1.87	8.1	10.59	1.96	10.62	11.44	2.06	6.09	3.67	3.87	7.86	4.32	4.86	15.68	5.71	9.02	9.48	1	0	0	0	1	0	1	0	0	0	0	0
Opistophthalmus_boehmi	Psammophilous	9.24	4.31	7.78	9.56	9.61	10.48	2.52	8.42	23.41	3.26	2.8	7.42	2.32	2.44	5.93	8.47	1.88	6.97	8.51	2.07	9.59	10.04	2.42	14.06	11.28	3.01	6.98	2.79	3.22	7.62	2.89	3.69	14.41	4.46	7.68	8.95	0	1	0	0	1	0	1	1	0	0	0	0
Opistophthalmus_karrooensis	Pelophilous	14.37	10.84	12.41	13.33	13.03	14.19	4.52	9.7	36.71	4.03	3.58	12.23	3.3	3.84	9.59	13.56	2.5	11.2	13.85	2.75	13.92	15.36	3.08	17.47	16.33	3.68	12.84	4.28	3.69	11.53	5.59	4.09	23.02	5.55	9.74	13.53	1	0	1	0	1	0	1	1	0	0	0	0
Opistophthalmus_wahlbergi	Psammophilous	10.62	5.49	8.37	9.87	9.3	9.46	3.88	6.85	26.88	2.84	2.36	8.04	2.23	2.27	7.56	9.76	2.52	9.42	11.23	2.36	5.35	20.75	2.99	14.07	12.75	4.2	6.84	2.17	3.17	8.08	2.36	3.03	17.05	3.91	7.26	11.23	0	1	0	0	0	0	1	0	0	0	0	0
Pandinoides_cavimanus	Pelophilous	14.31	7.3	12.75	15.19	14.84	15.31	4.35	11.42	45.61	6.02	4.81	10.75	4.45	5.34	10.2	13.01	2.74	10.52	13.41	2.97	14.12	16.22	2.3	17.32	18.33	3.91	11.39	6.37	4.63	14.02	6.16	5.71	26.26	6.82	16.86	18.12	1	0	0	0	0	0	1	0	0	0	0	0
Scorpio_maurus	Pelophilous	9.81	4.4	8.48	10.21	9.6	9.61	3.22	8.69	31.47	4.74	3.92	7.98	3.46	3.89	5.71	8.17	1.67	7.02	9.05	1.53	8.76	10.53	1.9	10.56	12.36	2.4	6.92	3.37	2.75	7.38	3.53	3.75	14.11	4.67	10.04	8.9	1	0	0	0	1	0	1	0	0	0	0	0
Hadogenes_granulatus	Lithophilous	17.42	8.16	16.93	18.13	18.66	17.53	7.12	13.57	80.21	2.59	3.91	10.58	4.27	3.04	12.04	16.38	2.11	15.05	17.15	3.88	19.07	16.45	4.36	19.82	20.83	2.66	14.87	6.73	4.71	15.68	7.03	5.6	31.71	10.31	5.95	16.31	0	0	1	0	0	0	0	0	0	0	1	0
Hadogenes_paucidens	Lithophilous	11.14	5.86	10.58	11.33	11.84	10.21	5.71	9.56	33.18	1.72	2.42	5.99	1.97	1.45	8.64	11.99	2.39	10.75	13.71	2.56	12.61	15.47	2.76	13.07	12.82	2.94	8.84	3.85	2.54	9.63	5.32	3.28	19.21	6.67	3.43	9.86	0	0	1	0	0	0	0	0	0	0	1	0
Opisthacanthus_capensis	Lithophilous	9.56	4.8	8.18	9.5	10.25	9.35	1.97	6.71	23.61	2.52	2.7	6.99	2.78	1.71	5.27	7.72	1.94	6.66	9.08	2.08	8.63	10.22	2.17	9.84	10.54	3	6.73	2.81	3.95	7.78	3.48	3.85	15	3.99	6.85	9	0	0	1	0	1	0	0	1	0	0	1	0
Opisthacanthus_asper	Phytophilous	11.34	4.84	11.19	12.28	12.01	11.79	3.39	9.26	29.16	2.95	2.98	8.19	3.17	2.49	6.9	9.74	1.7	8.93	10.95	2.02	9.22	12.98	2.2	12.31	13.75	2.85	8.3	4.58	3.39	9.49	4.35	4.32	19.45	5.35	8.8	11.4	0	0	0	1	0	1	0	1	1	1	0	0
Opisthacanthus_elatus	Lithophilous	11.83	5.82	10.25	13.02	12.74	11.47	3.43	8.7	24.58	2.87	2.87	8.74	3.01	2.74	8.42	12.18	2.15	10.44	14.13	2.34	12.09	15.16	2.67	14.23	15.72	2.65	10.37	4.57	3	10.15	5.63	4.28	21.7	4.89	9.16	11.86	0	0	1	0	1	0	0	1	0	0	1	0
Paravaejovis_gravicaudus	Psammophilous	5.02	2.21	4.38	4.77	4.65	4.98	1.33	4.53	16.98	2.9	2.48	5.31	1.97	2.28	3.6	4.98	1.14	5	5.75	0.9	5.78	7.45	0.95	6.98	8.39	1.69	3.88	1.34	1.16	4.33	1.52	1.39	7.21	1.64	1.88	4.22	0	1	0	0	0	0	1	0	0	0	0	0
Paravaejovis_spinigerus	Psammophilous	5.73	2.38	4.41	5.37	5.29	6.06	1.55	5.43	21.2	3.53	3.02	6.46	2.46	2.86	3.6	5.3	0.98	4.79	6.76	1.4	6.6	8.53	1.24	8.22	9.68	1.37	4.58	1.37	1.25	4.88	1.74	1.64	8	2.2	2.38	4.6	1	1	1	1	0	0	1	0	1	0	0	0
Paruroctonus_sp	Psammophilous	4.09	1.7	3.61	4.29	4.13	4.95	1	4.58	15.1	2.4	2	4.72	1.85	2.06	2.96	4.66	0.91	3.93	5.27	1.17	5.21	6.27	0.76	6.1	6.38	0.98	3.19	1.18	1.03	3.79	1.37	1.38	6.12	1.86	1.92	3.07	0	1	0	0	0	0	0	0	0	0	0	0
Vejovoidus_longiunguis	Psammophilous	6.84	2.35	6.84	6.55	6.63	7.3	1.73	5.64	24.19	2.97	2.53	8.61	1.51	1.73	4.58	6.77	0.94	6.7	8.85	1.25	11.28	10.43	1.58	12.78	10.9	1.45	4.9	1.63	1.2	5.65	2.43	1.84	10.65	3.56	2.36	7.04	0	1	0	0	0	0	0	0	0	0	0	0
Smeringurus_mesaensis	Psammophilous	7.81	3.8	6.24	7.67	7.48	8.24	2.46	6.3	34.96	2.8	2.65	9.27	2.7	2.48	7.37	8.23	2.22	8.34	11.16	2.65	10.93	11.96	2.12	13.27	13.62	2.73	6.81	2.41	1.61	6.5	2.66	2.31	13.96	3.78	4.58	8.56	0	1	0	0	1	0	1	0	0	0	0	0
