# Supplementary material for: Reevaluating Scorpion Ecomorphs using a Naïve Approach
Source: Research Square preprint supplement (doi:10.21203/rs.3.rs-1017831/v1), 2021-11-01
Supplement: Supplementary file 3 [file 940c43ebd935eaa56fc581f0.xlsx]

## Sheet: Folha1
Morphological traits	K	P
Metasoma.avWidth	0.337514	< 0,001
Metasoma.avHeight	0.316479	< 0,001
H.chela	0.266454	< 0,001
H.patella	0.224619	< 0,001
W.femur	0.224611	< 0,001
Distal.leg.1	0.220807	< 0,001
Metasoma.L	0.210225	< 0,001
W.patella	0.207446	< 0,001
W.vesicle	0.201078	< 0,001
L.Median.eyes.to.front.edge	0.196855	0.001
W.chela	0.195868	< 0,001
W.Prosoma	0.183924	0.001
L.chela	0.174929	0.0006
L.Prosoma	0.173377	0.002
W.Mesosoma.7th.terg.	0.172173	0.001
L.patella	0.152733	0.0066
L.mov.finger	0.149189	0.0036
W.Mesosoma.1th.terg.	0.144409	0.012
W.Mesosoma.4th.terg.	0.143009	0.007
Distal.leg.2	0.13855	0.0208
L.telson	0.134658	0.0096
Proximal.leg.1	0.132937	0.0092
L.Mesosoma.4th.terg.	0.132471	0.0936
L..Pedipalp.femur	0.132336	0.0168
L.left.leg4.tarsus	0.129764	0.0476
H.vesicle	0.12753	0.0152
Proximal.leg3	0.121416	0.0266
Distal.leg4	0.120928	0.0608
Distal.leg3	0.118538	0.0618
W.Prosoma.midlle	0.118123	0.035
H.femur	0.11141	0.0738
L.left.leg1.tarsus	0.10753	0.0874
Proximal.leg.2	0.0992814	0.1406
Proximal.leg4	0.0971731	0.203
L.left.leg2.tarsus	0.0651914	0.73
L.left.leg3.tarsus	0.0621981	0.846
